# Supplementary material for: Dispersed Conducting Polymer Nanocomposites with Glucose Oxidase and Gold Nanoparticles for the Design of Enzymatic Glucose Biosensors
Source: MDPI journal article supplement (doi:10.3390/polym13132173), 2021-06-30
Supplement: s1 [file s1]

## *Supplementary material*

### **Dispersed Conducting Polymer Nanocomposites with Glucose Oxidase and Gold Nanoparticles for the Design of Enzymatic Glucose Biosensors**

**Natalija German**<sup>1,2</sup>, **Almira Ramanaviciene**<sup>1,2</sup>, **Arunas Ramanavicius**<sup>3,4\*</sup>

<sup>1</sup> Department of Immunology, State Research Institute Centre for Innovative Medicine, Santariskiu 5, LT-08406 Vilnius, Lithuania; natalija.german@imcentras.lt (N.G.); almira.ramanaviciene@chf.vu.lt (AR)

<sup>2</sup> NanoTechnas—Center of Nanotechnology and Materials Science, Faculty of Chemistry and Geosciences, Vilnius University, LT-03225 Vilnius, Lithuania

<sup>3</sup> Department of Physical Chemistry, Faculty of Chemistry and Geosciences, Vilnius University, Naugarduko 24, LT-03225 Vilnius, Lithuania

<sup>4</sup> Division of Materials Science and Electronics, State Scientific Research Institute Center for Physical Sciences and Technology, Savanorių ave. 231, LT-02300 Vilnius, Lithuania

\* Correspondence: arunas.ramanavicius@chf.vu.lt

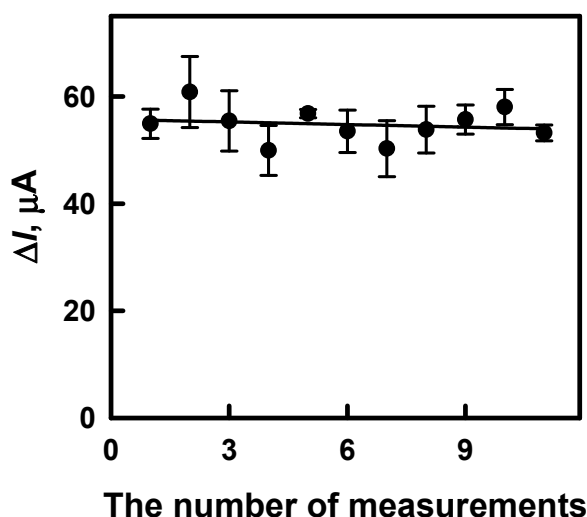

**Figure S1.** The reproducibility of enzymatic biosensors based on GR electrode modified by PANI-AuNPs<sub>(6 nm)</sub>-GOx/GOx for 19.7 mmol L<sup>-1</sup> of glucose concentration. Amperometric responses were registered in 0.05 mol L<sup>-1</sup> SA buffer, pH 6.0, with 0.01 mol L<sup>-1</sup> KCl and 6.0 mmol L<sup>-1</sup> PMS.
